# Supplementary material
Source: PubMed Central journal article supplement (PMC2077266)

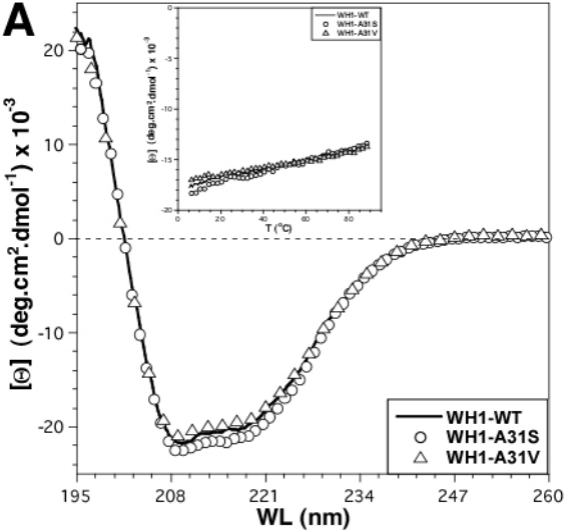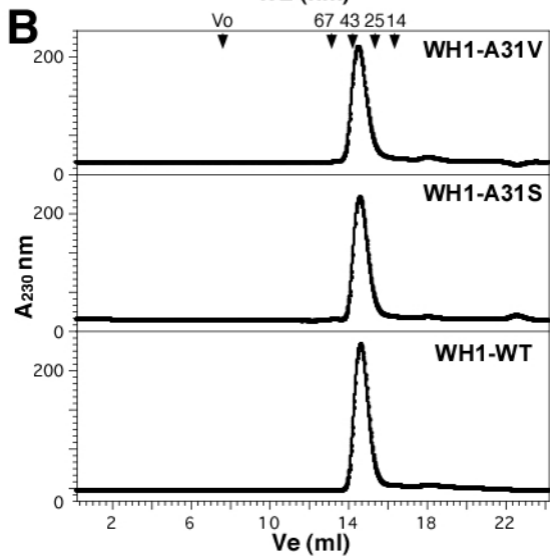

Supplement: pnas_0702006104_1.pdf [file pnas_0702006104_1.pdf]
